# Supplementary material
Source: PubMed Central journal article supplement (PMC6645983)
Supplement: ao8b00510_si_001.pdf [file ao8b00510_si_001.pdf]

## Novel Conducting and Biodegradable Copolymers with Non-Cytotoxic Properties towards Embryonic Stem Cells

Aruã C. da Silva<sup>a</sup>, Ana Teresa S. Semeano<sup>b</sup>, André H. B. Dourado<sup>a</sup>, Henning Ulrich<sup>b</sup> and Susana Inés Córdoba de Torresi<sup>a,\*</sup>

<sup>a</sup>Department of Fundamental Chemistry, Institute of Chemistry, University of São Paulo, Av. Prof. Lineu Prestes, 748, 05508-000 São Paulo, SP, Brazil

<sup>b</sup>Department of Biochemistry, Institute of Chemistry, University of São Paulo, São Paulo, Brazil

\* Corresponding Author: storresi@iq.usp.br

### Supplementary Information

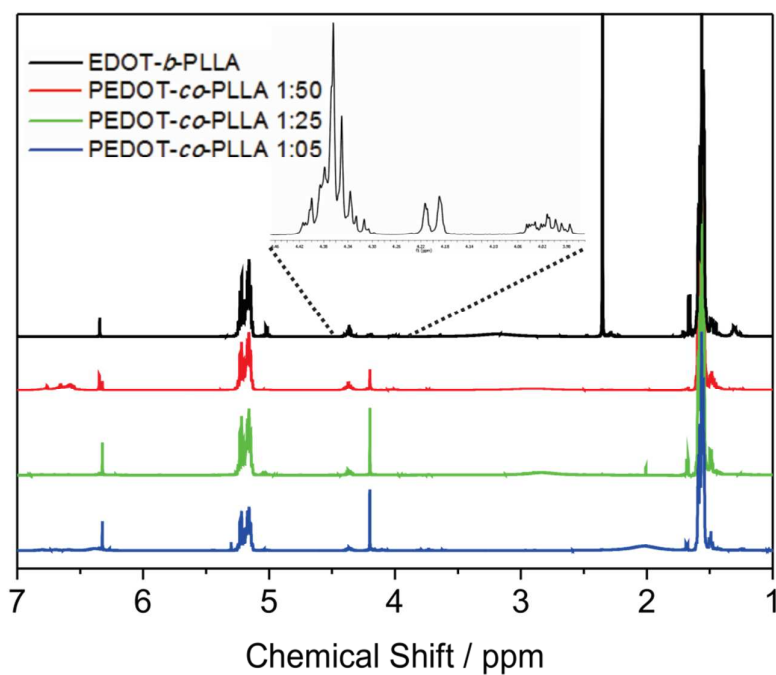

**Figure S1** – <sup>1</sup>H NMR spectra of EDOT-PDLLA (black), and conducting biodegradable copolymers of PEDOT-*co*-PDLLA 1:50 (red), 1:25 (green) and 1:05 (blue).

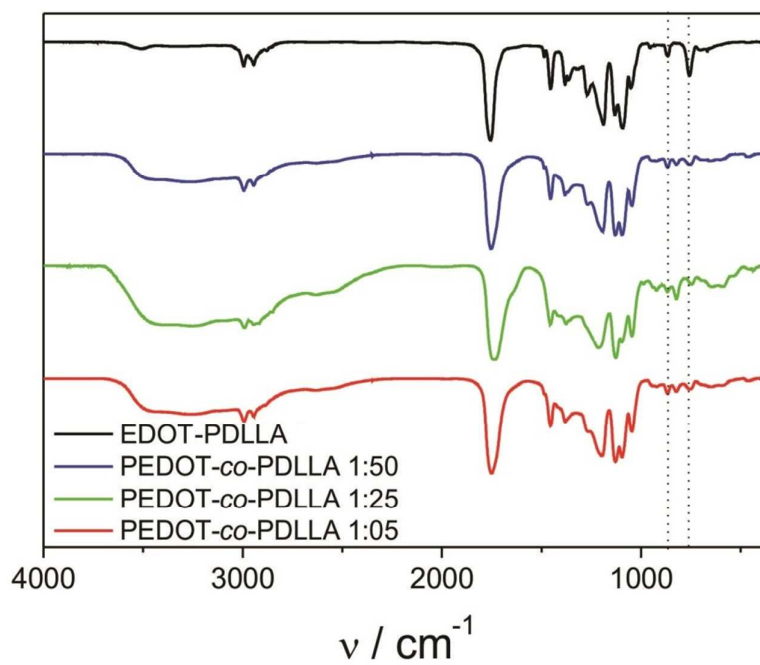

**Figure S2**– Infrared spectra of EDOT-PDLLA (black), and conducting biodegradable copolymers of PEDOT-co-PDLLA 1:50 (blue), 1:25 (green) and 1:05 (red). Regions of  $765$  and  $872 \text{ cm}^{-1}$  are highlighted.

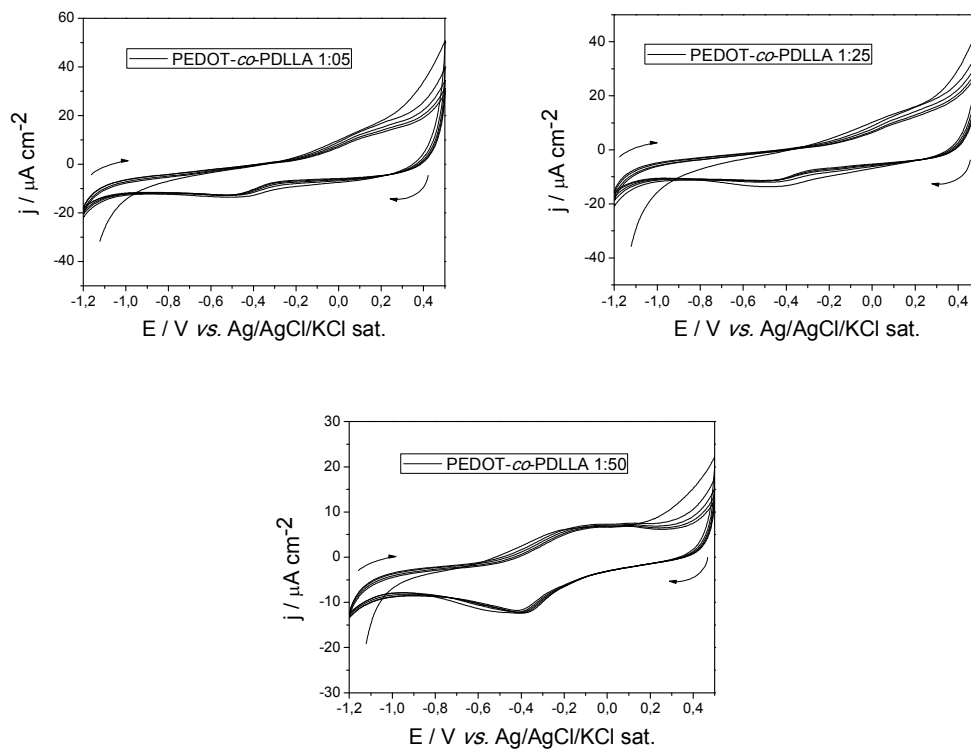

**Figure S3** –  $j/E$  potentiodynamic profiles of 5 cycles with PEDOT-co-PDLLA 1:05, 1:25 and 1:50, respectively, deposited onto glassy carbon electrode. All experiments were recorded at scan rate of  $0.01 V s^{-1}$  in PBS buffer pH 7.4 as supporting electrolyte.

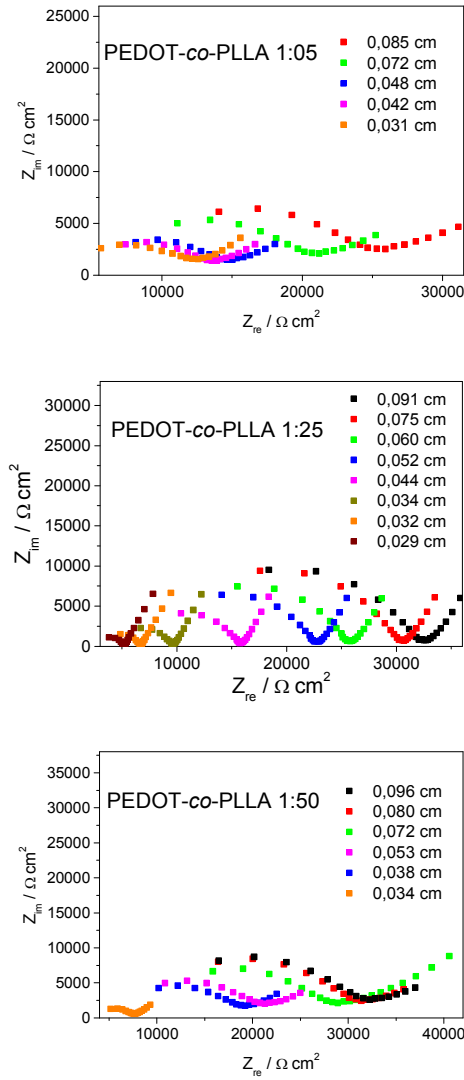

**Figure S4** – Nyquist plot of PEDOT-co-PDLLA 1:05, 1:25 and 1:50, respectively, obtained using 2 electrodes system. All experiments were recorded as 0.01 Hz to  $10^5$  Hz frequency range and amplitude of 10 mV.
